# Supplementary material for: COP9 Signalosome CSN4 and CSN5 Subunits Are Involved in Jasmonate-Dependent Defense Against Root-Knot Nematode in Tomato
Source: PubMed Central journal article supplement (PMC6794412; doi:10.3389/fpls.2019.01223), 2019-10-09
Supplement: DataSheet_1.pdf [file DataSheet_1.pdf]

# Supplemental Figure S1

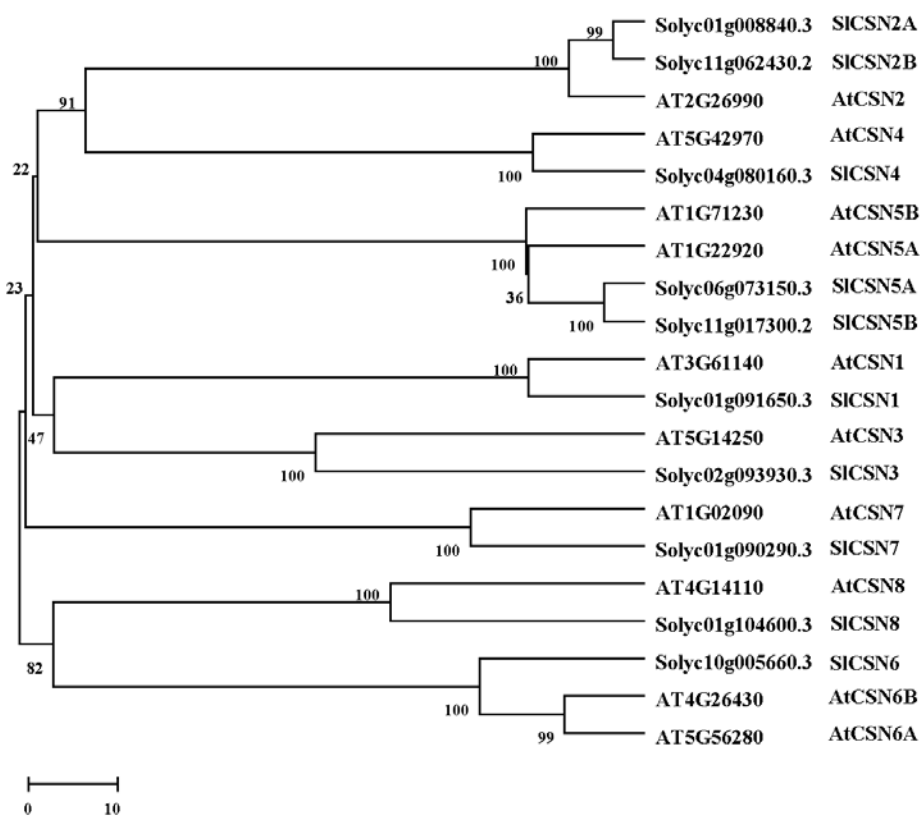

# Supplemental Figure S2

**A**

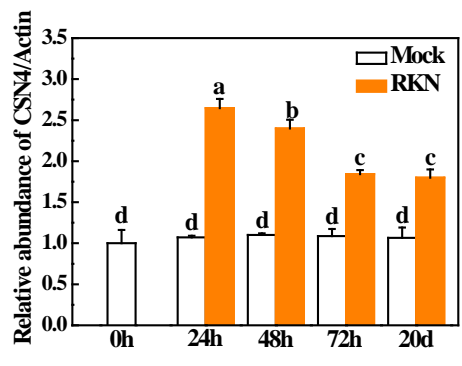

**B**

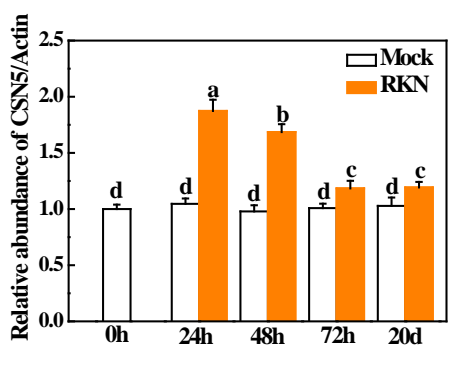

# Supplemental Figure S3

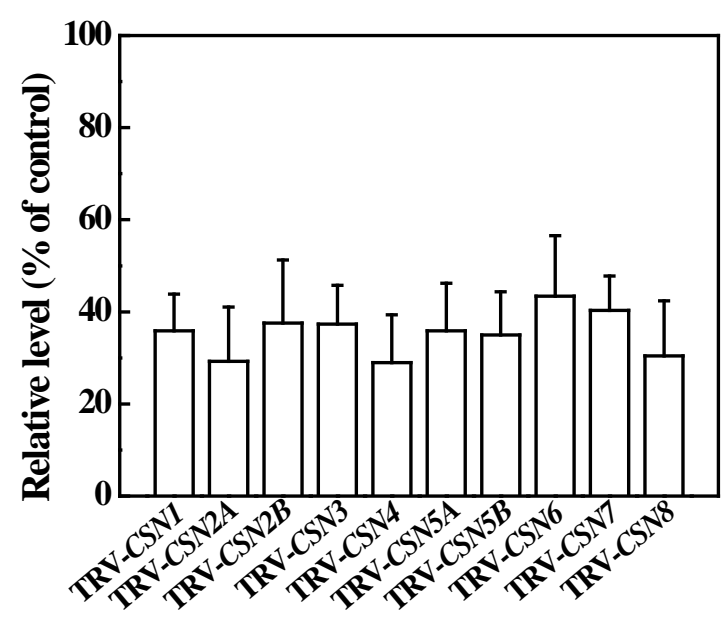

# Supplemental Figure S4

**A**

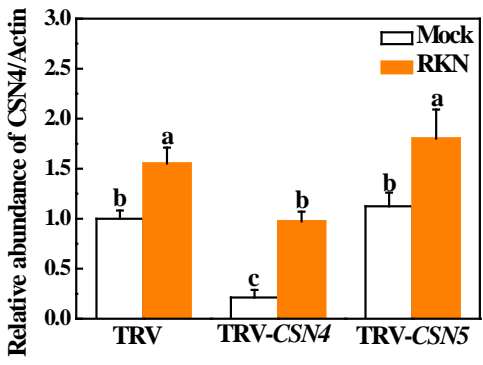

**B**

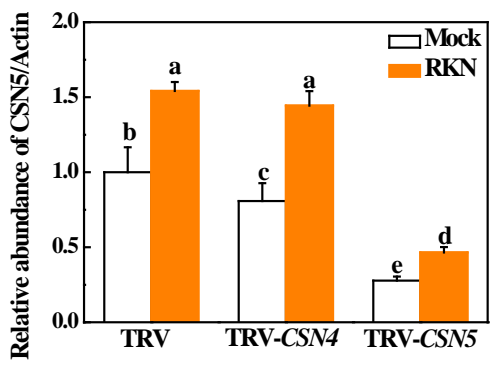

**Supplemental Table S1** Primers used for VIGS vectors construction.

| Gene name    | Accession number | Restriction sites | PCR length                          | Forward primer                      | Reverse primer                          |
|--------------|------------------|-------------------|-------------------------------------|-------------------------------------|-----------------------------------------|
| <i>CSN1</i>  | Solyc01g091650   | BamHI/XhoI        | 299 bp<br>(from +2 bp to +300 bp)   | 5'-agcggatccTGGAGCCTGACGAGGATT-3'   | 5'-agcctcgagATAATTAGTGCCCAAACGTC-3'     |
| <i>CSN2A</i> | Solyc01g008840   | BamHI/XhoI        | 300 bp<br>(from +7 bp to +306 bp)   | 5'-agcggatccTCTGATGCGGATATGGA-3'    | 5'-agcctcgagACTATAGTTCCGTGTCACTG-3'     |
| <i>CSN2B</i> | Solyc11g062430   |                   |                                     |                                     |                                         |
| <i>CSN3</i>  | Solyc02g093930   | BamHI/XhoI        | 299 bp<br>(from +2 bp to +300 bp)   | 5'-agcggatccTGAATCTGAACATGAATTCA-3' | 5'-agcctcgagCAACTGGATTTGCTCTGTA-3'      |
| <i>CSN4</i>  | Solyc04g080160   | EcoRI/BamHI       | 276 bp<br>(from +713 bp to +988 bp) | 5'-agcgaattcGTCCTCAACGATCTCGT-3'    | 5'-agcggatccGAATGCCCAACAAAGTGC-3'       |
| <i>CSN5A</i> | Solyc06g073150   | EcoRI/BamHI       | 367 bp<br>(from +622 bp to +988 bp) | 5'-agcgaattcTATAAGCCTCCAGATGACCC-3' | 5'-agcggatccCGACAGTAATCTTAGCACTATCAC-3' |
| <i>CSN5B</i> | Solyc11g017300   |                   |                                     |                                     |                                         |
| <i>CSN6</i>  | Solyc10g005660   | BamHI/XhoI        | 290 bp<br>(from +11 bp to +300 bp)  | 5'-agcggatccCATCCAGCAGCGGCTTAACC-3' | 5'-agcctcgagACACCTTCTTATAGAGCTC-3'      |
| <i>CSN7</i>  | Solyc01g090290   | BamHI/XhoI        | 298 bp<br>(from +325 bp to +533 bp) | 5'-agcggatccAGTATTGCTGGCTGTCTTCC-3' | 5'-agcctcgagACCAGTCAGTTAATGTCTG-3'      |
| <i>CSN8</i>  | Solyc01g104600   | BamHI/XhoI        | 299 bp<br>(from +2 bp to +300 bp)   | 5'-agcggatccTGGATACTTCTCAACTCAAC-3' | 5'-agcctcgagTCCACGAATAGCCTCATGTA-3'     |

**Supplemental Table S2** Primers used for qRT-PCR assays.

| Gene name    | Accession number | Forward primer                            | Reverse primer                             |
|--------------|------------------|-------------------------------------------|--------------------------------------------|
| <i>ACTIN</i> | Solyc11g005330   | 5'-TGTCCTATTTACGAGGGTTATGC-3'             | 5'-CAGTTAAATCACGACCAGCAAGAT-3'             |
| <i>CSN1</i>  | Solyc01g091650   | 5'-GTCACATATGCTTCTTGTCTG-3'               | 5'-CGAGACAAATGGGTGGGTAT-3'                 |
| <i>CSN2A</i> | Solyc01g008840   | 5'-TATGGCAGAGAGAAAGTGGG-3'                | 5'-GTCATCCATTATTGTCCGTC-3'                 |
| <i>CSN2B</i> | Solyc11g062430   | 5'-GGGAGTATGGACGAATGAAT-3'                | 5'-AACCTCAGACTCCATCAGCA-3'                 |
| <i>CSN3</i>  | Solyc02g093930   | 5'-TCACTGATTCATCTTGGGCA-3'                | 5'-CAACTTTTTTCGACACTGCCA-3'                |
| <i>CSN4</i>  | Solyc04g080160   | 5'-GAAACCACATCAGCAAGCAC-3'                | 5'-ATCCCCGCATTCTATCTTCG-3'                 |
| <i>CSN5A</i> | Solyc06g073150   | 5'-CACGTTATGCATCCTTAATGG-3'               | 5'-ACCTGAGGATTCCGTCTGT-3'                  |
| <i>CSN5B</i> | Solyc11g017300   | 5'-TGGGCACTTAGTGGCAGC-3'                  | 5'-TGGATCAGAGGGTTCAGTCT-3'                 |
| <i>CSN6</i>  | Solyc10g005660   | 5'-TCCATCTACTCACTCACTTG-3'                | 5'-ACTCGCTTTCATAGATACTG-3'                 |
| <i>CSN7</i>  | Solyc01g090290   | 5'-GGGCATAGTTAGAGGAAAGC-3'                | 5'-CTTCCTGTCCGATTCACTCA-3'                 |
| <i>CSN8</i>  | Solyc01g104600   | 5'-TGGTGGCTGTTTGGAGGATT-3'                | 5'-AATAAGCGGAAAGAAGGAGC-3'                 |
| <i>PI-2</i>  | Solyc03g020080   | 5'-GGATGCTTCTGGGATACGTT-3'                | 5'-TGGATGCTCCGAGACTACAG-3'                 |
| <i>COII</i>  | Solyc05g052620   | 5'-GGATGCTTCTGGGATACGTT-3'                | 5'-TGGATGCTCCGAGACTACAG-3'                 |
| <i>LOXD</i>  | Solyc03g122340   | 5'-CCGTGGTTGACACATTATCG-3'                | 5'-ACAGCAGTCCGCCCTATTTA-3'                 |
| <i>AOC</i>   | Solyc02g085730   | 5'-GCGCGAATTCACCTCAACAGATTCAACTAACACTG-3' | 5'-GGGGCTCGAGTTAATTAGTGTAATTTTCAGTGCGGC-3' |
| <i>JAZ1</i>  | Solyc07g042170   | 5'-TTCCCTCAAGGTGGAATGAAGGCT-3'            | 5'-TCCGAAACTCGGAACCACCAAATC-3'             |
| <i>JAZ2</i>  | Solyc12g009220   | 5'-ACCTGATCAACCAGAGAAGGCA-3'              | 5'-AAACTCACACCAGATTGATCAGCTGT-3'           |
| <i>JAZ3</i>  | Solyc03g122190   | 5'-TTCCCTGCTGACAAAGCTAGAGCA-3'            | 5'-AGGGTGCAGATGAAACTGATCCGA-3'             |
| <i>JAZ4</i>  | Solyc12g049400   | 5'-GCCAAAGCCTCAGCAACAAAGGAT-3'            | 5'-ATCACTGCTCTGGCTTCTCTGCT-3'              |
| <i>JAZ5</i>  | Solyc03g118540   | 5'-TCAGCTGTTCCGTCTAGCAGCATT-3'            | 5'-TGCATTTGGTGTAACAGGTGGTGC-3'             |

---

|              |                |                                 |                                 |
|--------------|----------------|---------------------------------|---------------------------------|
| <i>JAZ6</i>  | Solyc01g005440 | 5'-AGTCGATGCTGGTCTCAAACGTCA-3'  | 5'-TCGAAGACATTGACCATCCCACCA-3'  |
| <i>JAZ7</i>  | Solyc11g011030 | 5'-TTGCTATGGCTCGTAGAGCAACTC-3'  | 5'-TTTCCCAATGAACGCTTGACGACG-3'  |
| <i>JAZ8</i>  | Solyc06g068930 | 5'-TCGTCAACCTCCCAATCATAAC-3'    | 5'-GGAAAGGGTAGTGAGTGCATC-3'     |
| <i>JAZ9</i>  | Solyc08g036640 | 5'-TTTGGAGCTCACTCTTATGCCTCC-3'  | 5'-AGTCAGTAGCATCGGAAACCACA-3'   |
| <i>JAZ10</i> | Solyc08g036620 | 5'-GGA ACTCACTCTTTCTCTAGCAAC-3' | 5'-TGGTGATGAAGGCTCAGACAGCTT-3'  |
| <i>JAZ11</i> | Solyc08g036660 | 5'-GGAGTTTAGGCTTATGCCACCTTC-3'  | 5'-GGCTCAGATATTGGTGACAGACTC-3'  |
| <i>JAZ12</i> | Solyc01g009740 | 5'-TGCGCATTCCGAGGCATGATGATA-3'  | 5'-CCTTCTTGCAATTGGCAACTCTGCT-3' |

---

**Supplemental Table S3** Primers used for yeast two-hybrid assays.

| Gene name    | Accession number | Restriction sites | Forward primer                                                  | Reverse primer                                                |
|--------------|------------------|-------------------|-----------------------------------------------------------------|---------------------------------------------------------------|
| <i>CSN4</i>  | Solyc04g080160   | SmaI/XhoI         | 5'-agccccgggtATGGAGAGTGCCTTCGCTAGTG-3'                          | 5'-agcctcgagCTAGACAGGAATAGGGAGCCCCT-3'                        |
| <i>CSN5A</i> | Solyc06g073150   | SmaI/BamHI        | 5'-agccccgggtATGGACTCTCTGAATTCTTACGCA-3'                        | 5'-agcggatccTCAGCTTTCGATCATGGGCTC-3'                          |
| <i>CSN5B</i> | Solyc11g017300   | SmaI/BamHI        | 5'-agccccgggtATGGACGCTCTGAATTCTTACG-3'                          | 5'-agcggatccTCAGGTTTCGACCATCGGCTCT-3'                         |
| <i>JAZ1</i>  | Solyc07g042170   | EcoRI/BamHI       | 5'-agcgaattcATGGCTTCATCGGAGATTGTGGATTCC-3'                      | 5'-agcggatccCTAGTATTGCTCAGTTTTCACTGCAAATTGAC-3'               |
| <i>JAZ2</i>  | Solyc12g009220   | SmaI/BamHI        | 5'-agccccgggtATGGGGTCATCGGAAAATATGGATTCCG-3'                    | 5'-agcggatccCTAGAAATATTGCTCAGTTTTAACAAATTGAGCAC<br>CTAATCC-3' |
| <i>JAZ3</i>  | Solyc03g122190   | EcoRI/BamHI       | 5'-agcgaattcATGTCGAATTTATGTGACGCTCGCCG-3'                       | 5'-agcggatccCTATAACTTGAAATTGAGATCGAGCTGATCTTCGC<br>TA-3'      |
| <i>JAZ4</i>  | Solyc12g049400   | SmaI/XhoI         | 5'-agccccgggtATGTCAAATAGGCAACTTTGTTCATTAGATAGTG<br>AGAAATCAC-3' | 5'-agcctcgagCTAGAAATTGAGATCAAATGATCTCCACGAGTC<br>CTT-3'       |
| <i>JAZ5</i>  | Solyc03g118540   | SmaI/BamHI        | 5'-agccccgggtATGGAGAGAGATTTTCATGGGGTTGACTGT-3'                  | 5'-agcggatccCTACTTGACCAAAGTATTATGTGGGGAGG-3'                  |
| <i>JAZ6</i>  | Solyc01g005440   | SmaI/BamHI        | 5'-agccccgggtATGGAGAGGGACTTTATGGGATTGAATATCAAA<br>GATT-3'       | 5'-agcggatccCTAGGTCTCCTTACCGGCTAACAGAG-3'                     |
| <i>JAZ7</i>  | Solyc11g011030   | EcoRI/BamHI       | 5'-agcgaattcATGGATTCAAGAATGGAGATAGATTTTATGGACCT<br>-3'          | 5'-agcggatccTTAGTTTTCCAATGAACGCTTGACGAC-3'                    |
| <i>JAZ8</i>  | Solyc06g068930   | EcoRI/BamHI       | 5'-agcgaattcATGCATTGGTCATATTCTAACAAGGCTCA-3'                    | 5'-agcggatccCTAATTTGCAGCAGGAAGTGAAGTACTT-3'                   |
| <i>JAZ9</i>  | Solyc08g036640   | EcoRI/BamHI       | 5'-agcgaattcATGAGAAGAAATTGTAATTTGGAGCTCACTCTTA<br>TGCC-3'       | 5'-agcggatccCTATTTGTGATATGGCGAAGTTGCTTGAAGTCT-3'              |
| <i>JAZ10</i> | Solyc08g036620   | SmaI/BamHI        | 5'-agccccgggtATGAGAAGAAAGTGAATTTGGAAGTCACTCAC-3'                | 5'-agcggatccCTAGTGATGATATGGAGAAGTTATTTGAAT-3'                 |
| <i>JAZ11</i> | Solyc08g036660   | EcoRI/BamHI       | 5'-agcgaattcATGAGAAGAAATTGTAATTTGGAGTTTAGGCTTAT<br>GCC-3'       | 5'-agcggatccCTAGTGATGATATGGCGAAGTTGTTTGAAGTCTAC<br>T-3'       |



*JAZ12*

Solyc01g009740

EcoRI/BamHI

5'-agcgaattcATGTCTTCAGGTACTGATAATGTGATTGG-3'

5'-agcggatccCTATTTCTTATTTTCAGGGGCAGCATGG-3'

---

**Supplemental Table S4** Primers used for BiFC assays.

| Gene name    | Accession number | Restriction sites | Forward primer                                     | Reverse primer                                                 |
|--------------|------------------|-------------------|----------------------------------------------------|----------------------------------------------------------------|
| <i>CSN4</i>  | Solyc04g080160   | PacI/SpeI         | 5'-cccttaattaacATGGAGAGTGCCTTCGCTAGTG-3'           | 5'-gggactagtGACAGGAATAGGGAGCCCCTTCT-3'                         |
| <i>CSN5A</i> | Solyc06g073150   | PacI/SpeI         | 5'-cccttaattaacATGGACTCTCTGAATTCCTACGCAT-3'        | 5'-gggactagtGCTTTCGATCATGGGCTC-3'                              |
| <i>CSN5B</i> | Solyc11g017300   | PacI/SpeI         | 5'-cccttaattaacATGGACGCTCTGAATTCCTTACG-3'          | 5'-gggactagtGGTTTCGACCATCGGCTCT-3'                             |
| <i>JAZ2</i>  | Solyc12g009220   | PacI/SpeI         | 5'-cccttaattaacATGGGGTCATCGGAAAATATGGATTCC<br>G-3' | 5'-gggactagtCTAGAAATATTGCTCAGTTTTTAACAAATTGAGCACCTAA<br>TCC-3' |
| <i>SIZF3</i> | Solyc06g075780   | PacI/SpeI         | 5'-cccttaattaacATGATAAAAATTAGAGAAG-3'              | 5'-gggactagtAGAGGATAAGAATGGAGGTAC-3'                           |
